# Supplementary material for: Challenges Experienced by Midwives Working in Rural Communities of the Bongo District in the Upper East Region of Ghana. A Qualitative Study
Source: Research Square preprint supplement (doi:10.21203/rs.3.rs-78724/v1), 2020-10-06
Supplement: Supplementary file 1 [file 004def47ee816e297d1f4c6c.docx]

**INTERVIEW GUIDE ON THE CHALLENGES EXPERIENCED BY MIDWIVES WORKING IN RURAL COMMUNITIES OF BONGO DISTRICT IN THE UPPER EAST REGION OF GHANA.**

1. Please tell me something about yourself and how long you have been working as a midwife in this health facility.
2. Please tell me all about your experiences working as a midwife in this health facility?
3. Please tell me all about the challenges you encounter working as a midwife in this health facility?
4. Please tell me your recommendations to improve your in this health facility?
